# Supplementary material for: Wound healing complications in patients with and without systemic diseases following hallux valgus surgery
Source: PubMed Central journal article supplement (PMC5983514; doi:10.1371/journal.pone.0197981), 2018-06-01

**Table 1. Patient groups concerning BMI.**

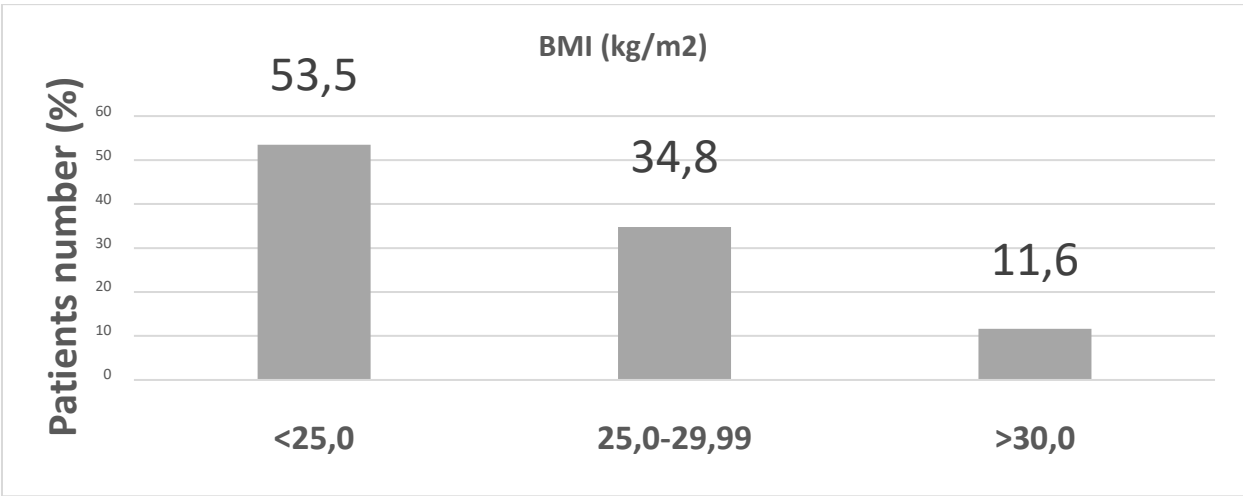

Supplement: pone.0197981.s001.pdf [file pone.0197981.s001.pdf]
