# Supplementary material for: Wound healing complications in patients with and without systemic diseases following hallux valgus surgery
Source: PubMed Central journal article supplement (PMC5983514; doi:10.1371/journal.pone.0197981), 2018-06-01
Supplement: pone.0197981.s003.pdf [file pone.0197981.s003.pdf]

**Table 3. Comorbidities and its number in studied population.**

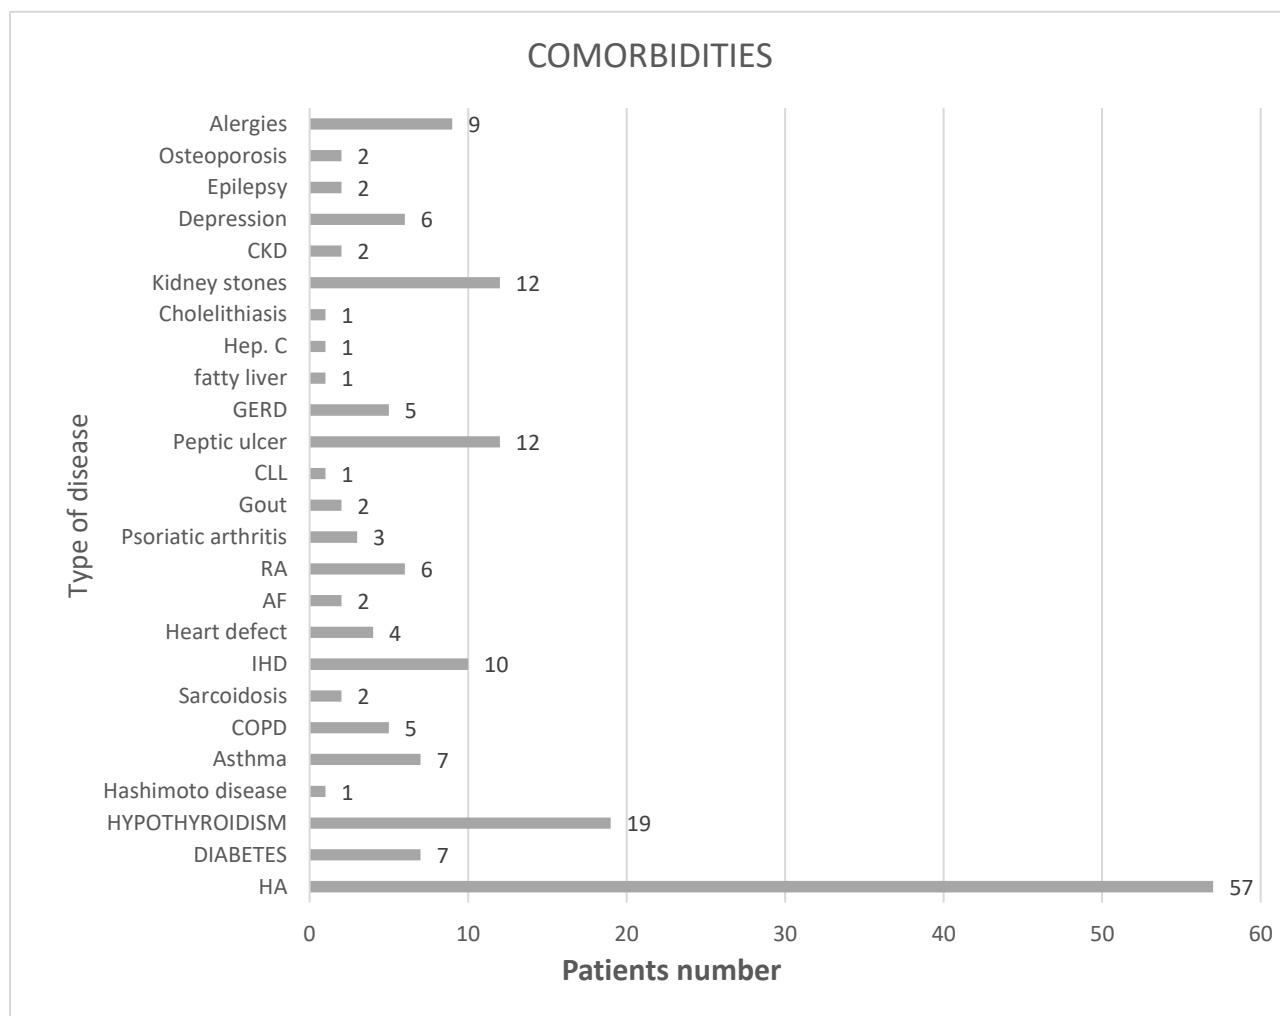

CKD – chronic kidney disease, Hep. C – hepatitis C, GERD – gastro-esophageal reflux disease, CLL – chronic lymphocytic leukemia, RA - rheumatoid arthritis, AF – atrial fibrillation, IHD – ischemic heart disease, COPD – chronic obturative pulmonary disease, HA – arterial hypertension.
