# Supplementary material for: Wound healing complications in patients with and without systemic diseases following hallux valgus surgery
Source: PubMed Central journal article supplement (PMC5983514; doi:10.1371/journal.pone.0197981), 2018-06-01
Supplement: pone.0197981.s006.pdf [file pone.0197981.s006.pdf]

**Table 6. Frequency and types of complications.**

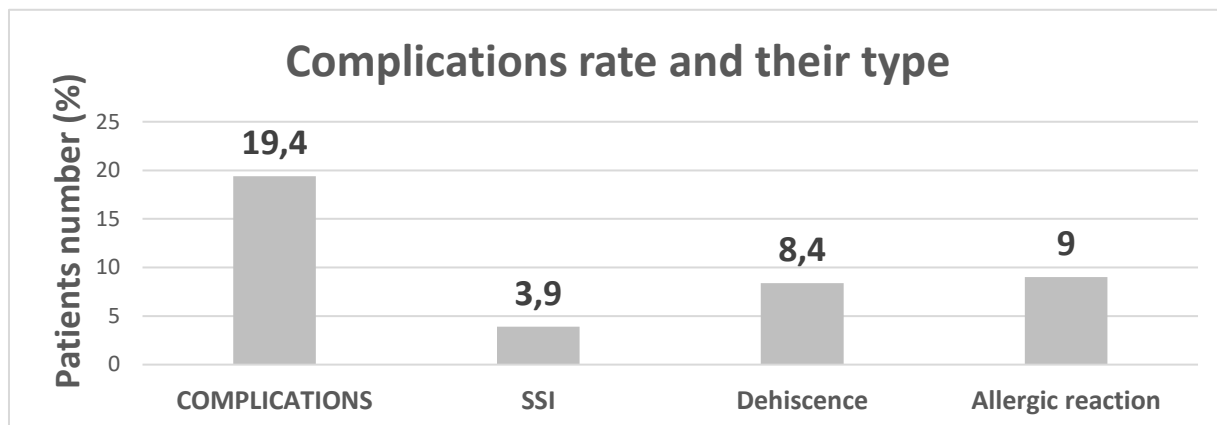

SSI – surgical site infection.
