# Supplementary material for: Wound healing complications in patients with and without systemic diseases following hallux valgus surgery
Source: PubMed Central journal article supplement (PMC5983514; doi:10.1371/journal.pone.0197981), 2018-06-01
Supplement: pone.0197981.s007.pdf [file pone.0197981.s007.pdf]

**Table 7. Complications frequency in patients with and without chronic diseases.**

|                           | <b>COMPLICATIONS</b> |        |            |        |          |
|---------------------------|----------------------|--------|------------|--------|----------|
| <b>COMORBIDITIES</b>      | <b>NO</b>            |        | <b>YES</b> |        | Total    |
| <b>NO</b>                 | 48                   | 78,69% | 13         | 21,31% | 61       |
| <b>YES</b>                | 77                   | 81,91% | 17         | 18,09% | 94       |
| <b>Total</b>              | 125                  |        | 30         |        | 155      |
| Chi <sup>2</sup> Pearsona | 0,25                 |        | df=1       |        | p=,61940 |
| R rang Spearman           | -0,04                |        | t=-,4939   |        | p=,62210 |
