# Supplementary material for: Wound healing complications in patients with and without systemic diseases following hallux valgus surgery
Source: PubMed Central journal article supplement (PMC5983514; doi:10.1371/journal.pone.0197981), 2018-06-01
Supplement: pone.0197981.s008.pdf [file pone.0197981.s008.pdf]

**Table 8. SSI frequency in patients with and without chronic diseases.**

|                           | <b>SSI</b> |        |            |       |          |
|---------------------------|------------|--------|------------|-------|----------|
| <b>COMORBIDITIES</b>      | <b>NO</b>  |        | <b>YES</b> |       | Total    |
| <b>NO</b>                 | 60         | 98,36% | 1          | 1,64% | 61       |
| <b>YES</b>                | 89         | 94,68% | 5          | 5,32% | 94       |
| <b>Total</b>              | 149        |        | 6          |       | 155      |
| Chi <sup>2</sup> Pearsona | 1,35       |        | df=1       |       | p=,24595 |
| R rang Spearman           | 0,09       |        | t=1,1578   |       | p=,24876 |
