# Supplementary material for: Wound healing complications in patients with and without systemic diseases following hallux valgus surgery
Source: PubMed Central journal article supplement (PMC5983514; doi:10.1371/journal.pone.0197981), 2018-06-01
Supplement: pone.0197981.s009.pdf [file pone.0197981.s009.pdf]

**Table 9. Wound dehiscence frequency in patients with and without chronic diseases.**

|                           | <b>WOUND DEHISCENCE</b> |        |           |        |          |
|---------------------------|-------------------------|--------|-----------|--------|----------|
| <b>COMORBIDITIES</b>      | <b>NO</b>               |        | <b>NO</b> |        | Total    |
| <b>NO</b>                 | 53                      | 86,89% | 8         | 13,11% | 61       |
| <b>YES</b>                | 89                      | 94,68% | 5         | 5,32%  | 94       |
| <b>Total</b>              | 142                     |        | 13        |        | 155      |
| Chi <sup>2</sup> Pearsona | 2,93                    |        | df=1      |        | p=,08717 |
| R rang Spearman           | -0,14                   |        | t=-1,716  |        | p=,08824 |
