# Supplementary material for: Wound healing complications in patients with and without systemic diseases following hallux valgus surgery
Source: PubMed Central journal article supplement (PMC5983514; doi:10.1371/journal.pone.0197981), 2018-06-01
Supplement: pone.0197981.s010.pdf [file pone.0197981.s010.pdf]

**Table 10. Allergic reaction frequency in patients with and without chronic diseases.**

|                           | <b>ALLERGIC REACTION</b> |        |            |        |              |
|---------------------------|--------------------------|--------|------------|--------|--------------|
| <b>COMORBIDITIES</b>      | <b>NO</b>                |        | <b>YES</b> |        | <b>Total</b> |
| <b>NO</b>                 | 57                       | 93,44% | 4          | 6,56%  | 61           |
| <b>YES</b>                | 84                       | 89,36% | 10         | 10,64% | 94           |
| <b>Total</b>              | 141                      |        | 14         |        | 155          |
| Chi <sup>2</sup> Pearsona | 0,75                     |        | df=1       |        | p=,38653     |
| R rang Spearman           | 0,07                     |        | t=,86241   |        | p=,38981     |
