# Supplementary material for: Wound healing complications in patients with and without systemic diseases following hallux valgus surgery
Source: PubMed Central journal article supplement (PMC5983514; doi:10.1371/journal.pone.0197981), 2018-06-01
Supplement: pone.0197981.s011.pdf [file pone.0197981.s011.pdf]

**Table 11. The impact of the different factors on complication occurrence.**

| RISK FACTOR         | OR   | [95% CI] | p     |       |
|---------------------|------|----------|-------|-------|
| Age                 | 0,98 | 0,95     | 1,01  | 0,130 |
| Sex                 | 0,83 | 0,09     | 7,36  | 0,865 |
| BMI                 | 0,93 | 0,83     | 1,04  | 0,185 |
| ANY comorbidities   | 0,82 | 0,36     | 1,83  | 0,620 |
| hypertension        | 1,19 | 0,52     | 2,68  | 0,683 |
| diabetes            | 1,71 | 0,32     | 9,30  | 0,532 |
| hypothyroidism      | 0,76 | 0,21     | 2,79  | 0,675 |
| Asthma              | 0,56 | 0,01     | 2,23  | 0,185 |
| COPD                | 1,04 | 0,11     | 9,69  | 0,970 |
| IHD                 | 0,44 | 0,05     | 3,65  | 0,450 |
| heart deffect       | 4,39 | 0,59     | 32,54 | 0,147 |
| RA                  | 0,66 | 0,01     | 2,63  | 0,221 |
| psoriatic arthritis | 2,12 | 0,19     | 24,19 | 0,545 |
| ulcer disease       | 0,82 | 0,17     | 3,96  | 0,806 |
| GERD                | 1,04 | 0,11     | 9,69  | 0,970 |
| allergy             | 0,43 | 0,01     | 1,70  | 0,130 |
| medications         | 1,34 | 0,57     | 3,15  | 0,504 |
| DMARD               | 0,83 | 0,09     | 7,36  | 0,865 |
| GCS                 | 1,28 | 0,33     | 4,96  | 0,723 |
| hormones            | 1,91 | 0,75     | 4,89  | 0,178 |
| smoking             | 2,07 | 0,77     | 5,61  | 0,151 |

BMI – body mass index, COPD – chronic obturative pulmonary disease, IHD – ischemic heart disease, RA - rheumatoid arthritis, GERD – gastro-esophageal reflux disease, DMARD - disease modifying antirheumatic drugs, GCS – glucocorticosteroids. No risk factor proved to be statistically significant ( $p>0,05$ ).
