# Supplementary material for: Wound healing complications in patients with and without systemic diseases following hallux valgus surgery
Source: PubMed Central journal article supplement (PMC5983514; doi:10.1371/journal.pone.0197981), 2018-06-01
Supplement: pone.0197981.s012.pdf [file pone.0197981.s012.pdf]

**Table 12. Correlation between comorbidities and VSS results.**

|                          | NVSS |        | NVSS     |        | NVSS     |        |       |
|--------------------------|------|--------|----------|--------|----------|--------|-------|
| COMORBIDITIES            | 0    |        | 1        |        | 2        |        | Total |
| No                       | 16   | 26,23% | 33       | 54,10% | 12       | 19,67% | 61    |
| Yes                      | 17   | 18,09% | 60       | 63,83% | 17       | 18,09% | 94    |
| Total                    | 33   |        | 93       |        | 29       |        | 155   |
| Chi <sup>2</sup> Pearson | 1,79 |        | df=2     |        | p=,40938 |        |       |
| R rang Spearman          | 0,05 |        | t=,64248 |        | p=,52153 |        |       |

NVSS 0 – patients scored 0 pts in VSS, NVSS1 – patients scored 1-3 pts. NVSS 2 – patients scored 4 or more pts. No statistically significant differences were found between healthy and comorbidities group.
